# Supplementary material for: A Novel Mathematical Model for Rough Cracks Repairing by Using the Method of Microbially Induced Carbonate Precipitation (MICP)
Source: Preprints.org preprint supplement (doi:10.20944/preprints202308.1624.v1), 2023-08-23
Supplement: Supplementary file 1 [file supplementary]

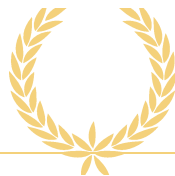

We certify that the following article

**A Novel Mathematical Model for Rough Cracks Repairing by Using the Method of Microbially Induced Carbonate Precipitation (MICP)**

Simiao Zhang, Shuhong Wang \*, Zulkifl Ahmed \*, Xin Zhao \*

has undergone English language editing by MDPI. The text has been checked for correct use of grammar and common technical terms, and edited to a level suitable for reporting research in a scholarly journal.

MDPI uses experienced, native English speaking editors. Full details of the editing service can be found at  
► <https://www.mdpi.com/authors/english>.

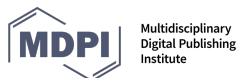

Basel, Switzerland  
August 2023

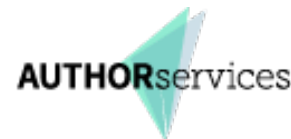

english-69957
